# Supplementary material for: CTAB-assisted AgBr -bismuth oxybromide based novel SERS substrate for label-free, non-invasive quantitative detection of detrimental synthetic food colorants
Source: Research Square preprint supplement (doi:10.21203/rs.3.rs-4022807/v1), 2024-03-11
Supplement: Supplementary file 1 [file e1a08bf9dff0a29bde8b4bdf.docx]

**CTAB-assisted AgBr -bismuth oxybromide based novel SERS substrate for label-free, non-invasivequantitative detection of detrimental synthetic food colorants**

Arti Saroj1, Venkatnarayan Ramanathan1*

1 Department of Chemistry, Indian Institute of Technology (BHU) Varanasi 221005, Uttar Pradesh, India

*author to whom correspondence must be addressed at vraman.chy@iitbhu.ac.in

**Supporting Information**


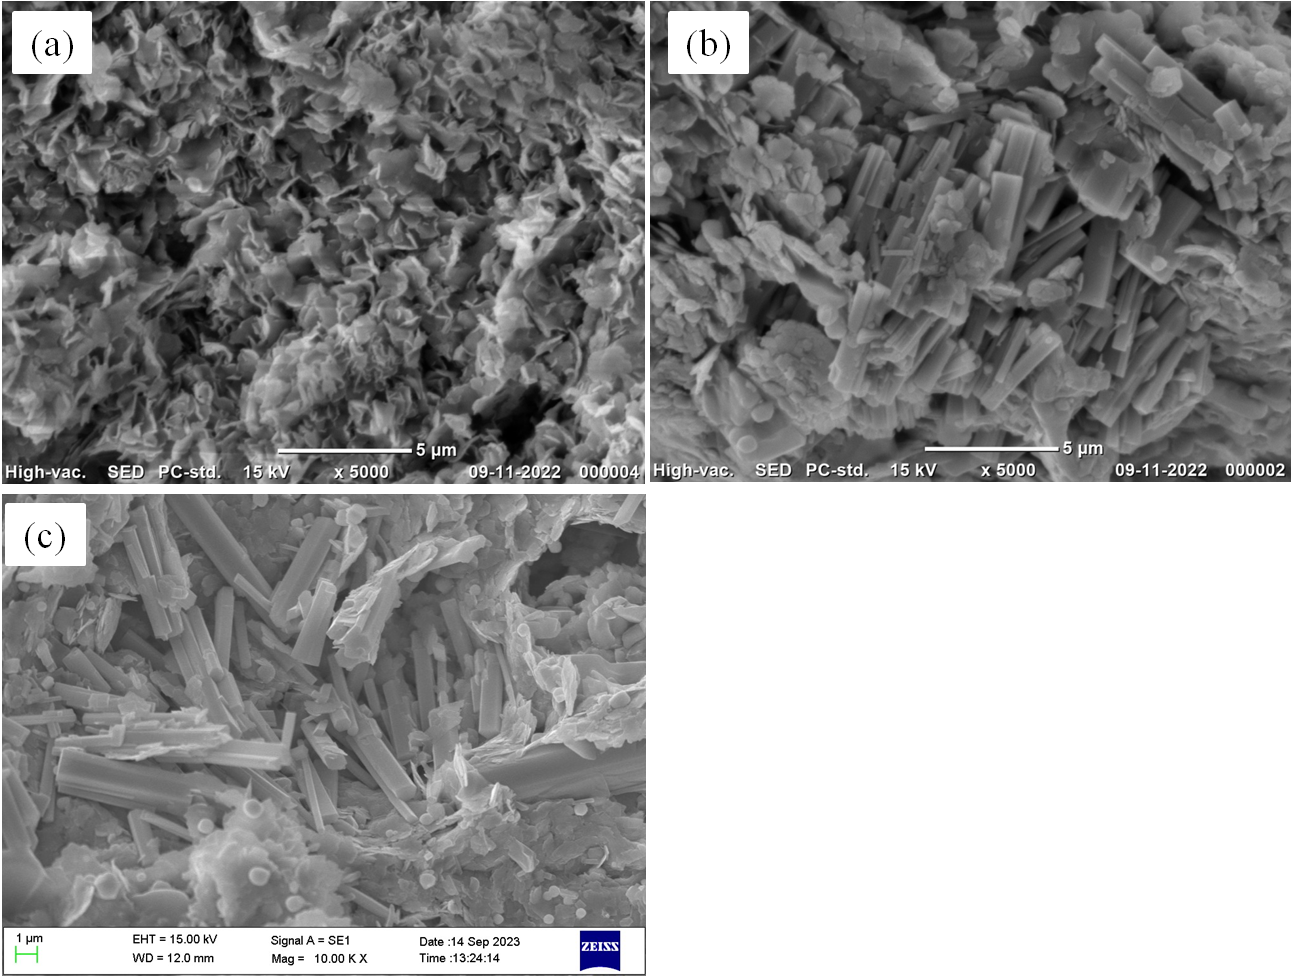


Figure S1. BT-SEM image of (a) BOB (b) Ag0.09BOB (c) Ag0.15BOB


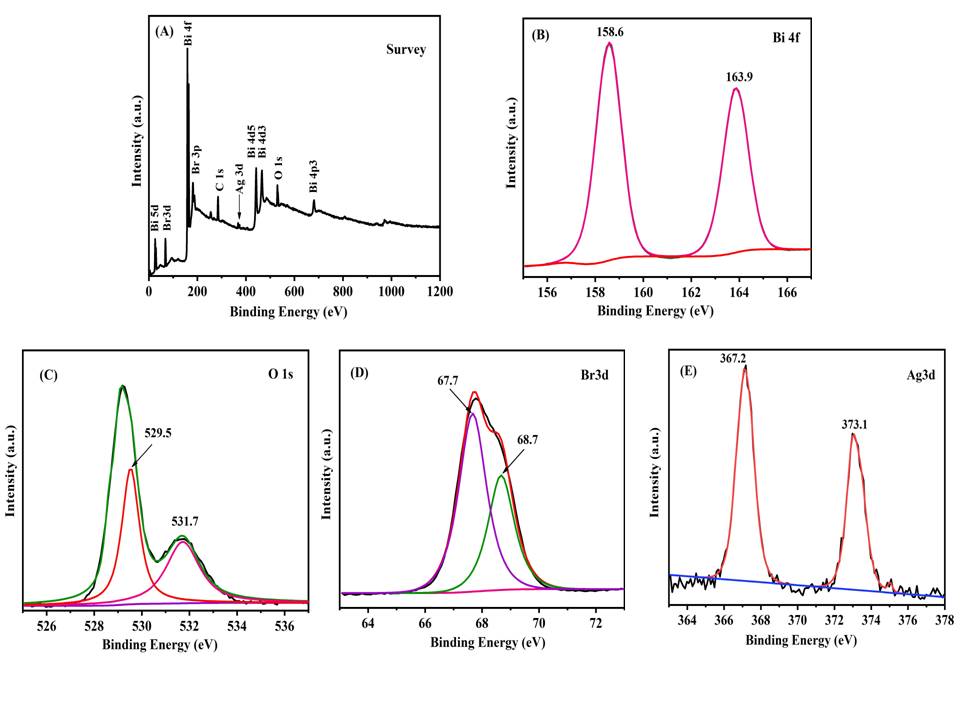


Figure S2 XPS spectrum of Ag0.15BOB(CTAB- AgBr- Bi3O4Br/BiOBr) (A) survey spectrum and high resolution spectrum for (B) Bi 4f, (C) O 1s, (D) Br 3d, (E) Ag 3d.


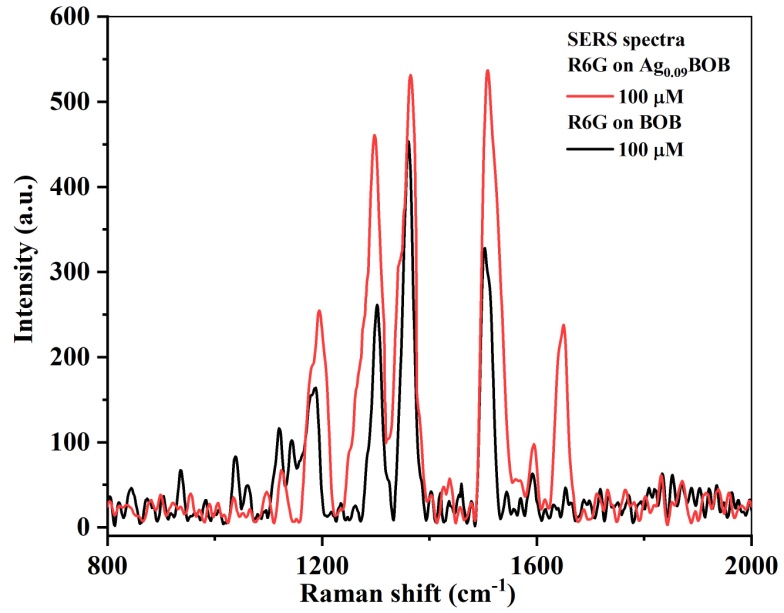


Figure S3 SERS spectra of 100 µM ethanolic solution of R6G on BOB and Ag0.09BOB.

Table ST1. Tentative assignment for the vibrational Raman modes of Rhodamin 6G, Allura red, Amaranth, Tartrazine and Sunset yellow.

| Analytes | Raman Peak ( cm-1) | Tentative Assignment |
| --- | --- | --- |
| Rhodamin 6G | 607  768  1117/1179  1302  1360/1504/1593/1644 | ipδ(C-C-C) ring  op δ(C-H)  ip δ(C-H)  ipδ(N-H)  ν (C-C) (36, 37) |
| Allura red | 751  974  1129/1578  1188  1223  1266  1383/1496  1407  1604 | ω(R1)  ω(C-H)R2  νas(R1)  νas(SO2)  ρ (C-H- R1)  ν(O-C- R1)  ω(C-H)  ρ (C-H)  νas( R2)(15) |
| Amaranth | 738  1052  1138/1175  1231  1363  1405/1434  1478  1572 | ρ(C-H)  νas (SO2)  ω(C-H)  ω(O-S)  ν(C-C)  ω(C-H)  ν (N-N)  νas (ring)(38-39) |
| Tartrazine | 623  802  1044  1132  1177  1217  1361  1414  1499  1597 | def(R1)  ν(C-O)  op (C – H); def. (R2)  op def(C-H-R1); δ(R1)  τ(R1)  ν(R1)  ν(C-N=N-C); νs(COO);wagg(R1)  ν(R1)  δ(R1); δ(C=C)  δ(R1);ipdef(C-H-R1); δ(O-H); νs(COO) (40) |
| Sunset yellow | 986  1123  1178  1231  1336  1384  1496  1545  1594 | ω(C-H-R2)  ν (N=N); ω(C-H- R1)  ν (N=N); ρ(C-H-R1); ρ(R1)  δ(C-C-R1); ν (C-N); ν (C-C- R2);  ν (C-N); νas(H-C-C-H-R1); ρ(R1)  νs(C-C-R2);ip δ(R1,R2)  ν (C-N); ν (C-O); ρ(N-H)  δ(C-C-R2); ρ(N-H); ρ(C-H)  νs(C-C-R1); ω(C-H-R1) (16) |

ν=stretching; δ=bending; ρ=rocking; τ=twisting; ω=wagging; s=symmetric; as=asymmetric; def=deformation;ip=in-plane; op=out-plane; R1=benzene ring;R2 =naphthalene ring

Table ST2: Comparison of the detection limits foranalytes with the previous report on different SERS substrates

| Substrate | Analytes | LOD (M) | Ref |
| --- | --- | --- | --- |
| Bi thin films  Au−BiOI  Ag/BR/Ag NPs  Gold nanodumbells  Ag0.15 BOB | R6G  R6G  TR  SY  R6G  TR  SY | 1× 10−2M  0.5 × 10−5M  2.1 × 10−5 M  1.1 × 10−5 M  1.0 × 10−5M  4.0 × 10−5M  4.0 × 10−5M | (21)  (26)  (*)  (**)  **This work** |

References

* Liu, H. *et al.* based sandwich type SERS sensor based on silver nanoparticles and biomimetic recognizer. *Sensors Actuators B Chem.***2020**, 313, 127989.

** Meng, J.; Qin, S.; Zhang, L.; Yang, L. Designing of a novel gold nanodumbbells SERS substrate for detection of prohibited colorants in drinks. *Appl. Surf. Sci.* **2016**, 366, 181–186.
